# Supplementary material for: Relation between anemia and blood levels of lead, copper, zinc and iron among children
Source: Springer Nature journal article supplement (doi:10.1186/1756-0500-3-133), 2010-05-12

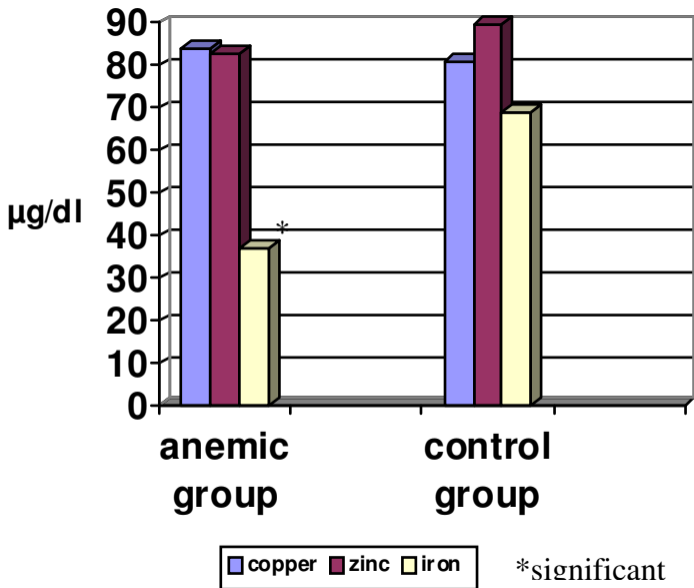

Supplement: 13104_2009_537_MOESM1_ESM.pdf [file 13104_2009_537_MOESM1_ESM.pdf]
